# Supplementary figures and images for: Development of frequency tuning shaped by spatial cue reliability in the barn owl’s auditory midbrain
Source: eLife journal article supplement (doi:10.7554/elife.84760), 2023-05-11

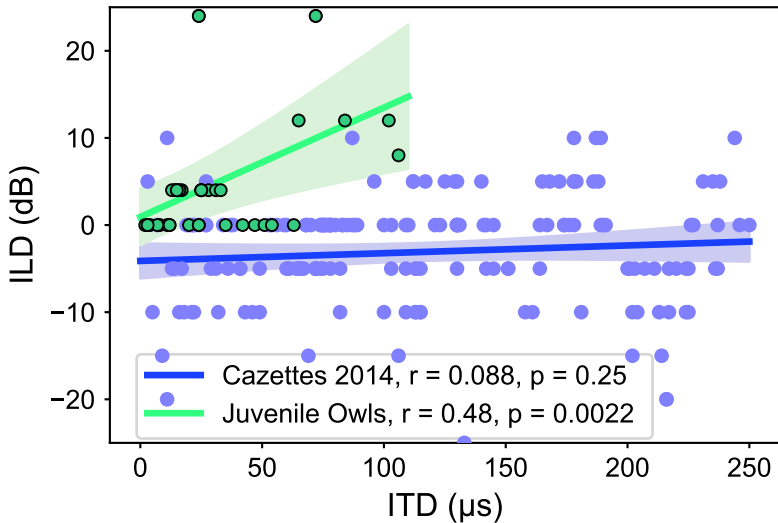

Supplement: supp [file elife-84760-supp-v1.zip]

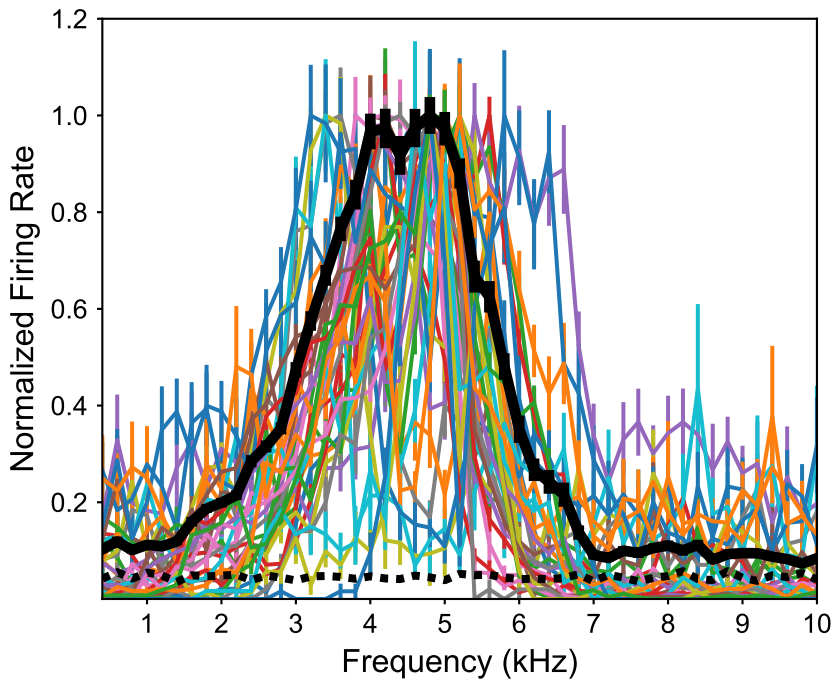

Supplement: supp [file elife-84760-supp-v1.zip]
